# Supplementary material for: Cerebral Hemorrhage in Children with Escherichia coli Meningitis: A seven-year Retrospective Study
Source: Research Square preprint supplement (doi:10.21203/rs.3.rs-5678578/v1), 2025-03-25
Supplement: Supplementary file 1 [file cfebf5c7ac99893226c165c1.docx]

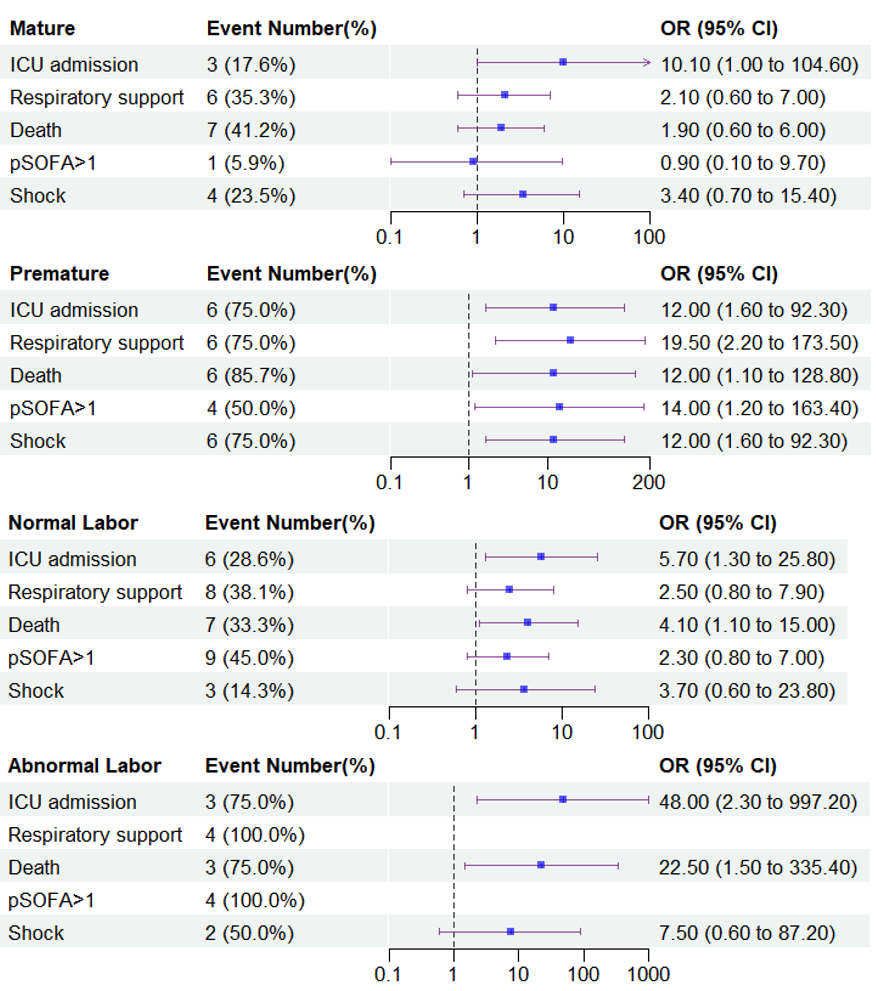


Supplementary Fig 1. Premature and abnormal labor for predicting adverse outcomes in pediatric patients with E.coli meningitis. Abbreviation: CI, confidence interval; OR, odds ratio; pSOFA, pediatric sequential organ failure assessment; ICU, intensive care unit.

Supplementary Table 1 Risk factor for intracerebral hemorrhage of E. coli Meningitis by univariate analysis.

|  | Total | Event Number(%) | OR (95%CI) | *P* |
| --- | --- | --- | --- | --- |
| CSF examination |  |  |  |  |
| WBC (×106/L) |  |  |  |  |
| ≤100 | 23 | 3 (13.0) | Reference | - |
| 100-5000 | 44 | 12 (27.3) | 2.5 (0.6, 10.0) | 0.19 |
| >5000 | 21 | 10 (47.6) | 6.1 (1.4, 26.8) | 0.02 |
| Protein (mg/L) |  |  |  |  |
| ≤1000 | 24 | 3 (12.5) | Reference | - |
| 1000-5000 | 48 | 16 (33.3) | 3.5 (0.9, 13.5) | 0.07 |
| >5000 | 16 | 6 (37.5) | 4.2 (0.9, 20.3) | 0.08 |
| Glucose (mmol/L) |  |  |  |  |
| >2.8 | 23 | 3 (13.0) | Reference | - |
| 1.0-2.8 | 24 | 5 (20.8) | 1.8 (0.4, 8.4) | 0.48 |
| ≤1.0 | 41 | 17 (41.5) | 4.7 (1.2, 18.5) | 0.03 |
| Chloride (mmol/L) |  |  |  |  |
| ≤120 | 59 | 18 (30.5) | Reference | - |
| >120 | 29 | 7 (24.1) | 0.7 (0.3, 2.0) | 0.53 |
| LDH (U/L) |  |  |  |  |
| ≤100 | 41 | 5 (12.2) | Reference | - |
| 100-300 | 25 | 9 (36.0) | 4.0 (1.2, 14.0) | 0.03 |
| >300 | 22 | 11 (50.0) | 7.2 (2.1, 25.2) | 0.01 |
| Blood laboratory indicators |  |  |  |  |
| WBC (×109/L) |  |  |  |  |
| 4-10 | 29 | 5 (17.2) | Reference | - |
| ≤4 | 9 | 6 (66.7) | 9.6 (1.8, 51.9) | 0.01 |
| 10-15 | 25 | 3 (12.0) | 0.7 (0.1, 3.1) | 0.59 |
| >15 | 25 | 11 (44.0) | 3.8 (1.1, 13.1) | 0.04 |
| CRP (mg/mL) |  |  |  |  |
| ≤20 | 17 | 5 (29.4) | Reference | - |
| 20-100 | 48 | 15 (31.2) | 1.1 (0.3, 3.7) | 0.89 |
| >100 | 23 | 5 (21.7) | 0.7 (0.2, 2.8) | 0.58 |
| PCT (ng/mL) |  |  |  |  |
| ≤0.5 | 14 | 3 (21.4) | Reference | - |
| 0.5-5 | 38 | 11 (28.9) | 1.5 (0.3, 6.4) | 0.59 |
| >5 | 36 | 11 (30.6) | 1.6 (0.4, 6.9) | 0.52 |
| IL-6 (pg/mL) |  |  |  |  |
| ≤500 | 47 | 10 (21.3) | Reference | - |
| 500-1500 | 20 | 4 (20.0) | 0.9 (0.3, 3.4) | 0.91 |
| >1500 | 21 | 11 (52.4) | 4.1 (1.3, 12.3) | 0.01 |

Abbreviation: CSF, cerebrospinal fluid; WBC, white blood count; LDH, lactate dehydrogenase; CRP, C-reactive protein; PCT, procalcitonin; IL-6, interleukin-6; CI, confidence interval; OR, odds ratio;

| Fig. 2 (A)Data source | | | |
| --- | --- | --- | --- |
|  | **Survive (n=71)** | **Death (n=17)** | ***P*** |
| **MRI abnormal amount** |  |  | 0.101 |
| 0 | 34 (47.9%) | 5 (29.4%) |  |
| 1 | 21 (29.6%) | 3 (17.6%) |  |
| 2 | 8 (11.3%) | 4 (23.5%) |  |
| 3 | 5 (7.0%) | 2 (11.8%) |  |
| 4 | 2 (2.8%) | 3 (17.6%) |  |
| 5 | 1 (1.4%) | 0 (0.0%) |  |
| **Cerebralhemorrhage** | 15 (21.1%) | 10 (58.8%) | 0.002 |
| Intraventricular hemorrhage | 11 (15.5%) | 9 (52.9%) | <0.001 |
| Subdural hemorrhage | 5 (7.0%) | 5 (29.4%) | 0.009 |
| Subarachnoid hemorrhage | 1 (1.4%) | 2 (11.8%) | 0.094 |
| **Hydrocephalus** | 4 (5.6%) | 4 (23.5%) | 0.042 |
| **Ependymitis** | 4 (5.6%) | 1 (5.9%) | 1.000 |
| **Ventriculomegaly** | 6 (8.5%) | 2 (11.8%) | 0.648 |
| **Meningealenhancement** | 11 (15.5%) | 1 (5.9%) | 0.300 |
| **Subduraleffusion** | 14 (19.7%) | 2 (11.8%) | 0.445 |
| **Brainabscess** | 5 (7.0%) | 1 (5.9%) | 1.000 |
| **Cerebraledema** | 1 (1.4%) | 1 (5.9%) | 0.351 |
| **Cerebralparenchymalischemia** | 2 (2.8%) | 1 (5.9%) | 0.479 |
| **Cerebralatrophy** | 1 (1.4%) | 0 (0.0%) | 1.000 |

Fig. 2 (B)Data source

|  | Non-Hemorrhage (n=63) | Hemorrhage (n=25) | *P* |
| --- | --- | --- | --- |
| pSOFA Score ≥ 2 (n, %) | 18 (28.6) | 13 (54.2) | 0.03 |
| ICU admission (n, %) | 4 (6.3) | 9 (36.0) | <0.01 |
| Sepsis (n, %) | 37 (58.7) | 12 (48.0) | 0.36 |
| Respiratory support (n, %) | 12 (19.0) | 12 (48.0) | 0.01 |
| Positive CSF culture (n, %) | 41 (65.1) | 22 (88.0) | 0.03 |
| Positive blood culture (n, %) | 37 (58.7) | 12 (48.0) | 0.36 |
| Dexamethasone use (n, %) | 21 (33.3) | 9 (36.0) | 0.81 |
| Prognosis (n, %) |  |  | 0.01 |
| Death | 7 (11.1) | 10 (40.0) |  |

Abbreviation: pSOFA, pediatric sequential organ failure assessment; ICU, intensive care unit

Fig. 3 Data source

|  | | | | |  | | | | | ICU admission | | | | | | | | | | | | | | |
| --- | --- | --- | --- | --- | --- | --- | --- | --- | --- | --- | --- | --- | --- | --- | --- | --- | --- | --- | --- | --- | --- | --- | --- | --- |
|  | | | | | TOTAL number | | | | | Event number (%) | | | | | OR (95%CI) | | | | | *P* | | | | |
| Cerebral hemorrhage | | | | |  | | | | |  | | | | |  | | | | |  | | | | |
| No | | | | | 63 | | | | | 4 (6.3%) | | | | | 1 | | | | |  | | | | |
| Yes | | | | | 25 | | | | | 9 (36.0%) | | | | | 8.3 (2.3, 30.5) | | | | | 0.001 | | | | |
| Subdural hemorrhage | | | | |  | | | | |  | | | | |  | | | | |  | | | | |
| No | | | | | 78 | | | | | 9 (11.5%) | | | | | 1 | | | | |  | | | | |
| Yes | | | | | 10 | | | | | 4 (40.0%) | | | | | 5.1 (1.2, 21.6) | | | | | 0.027 | | | | |
| Subarachnoid hemorrhage | | | | |  | | | | |  | | | | |  | | | | |  | | | | |
| No | | | | | 85 | | | | | 11 (12.9%) | | | | | 1 | | | | |  | | | | |
| Yes | | | | | 3 | | | | | 2 (66.7%) | | | | | 13.5 (1.1, 161.1) | | | | | 0.04 | | | | |
| Intraventricular hemorrhage | | | | |  | | | | |  | | | | |  | | | | |  | | | | |
| No | | | | | 68 | | | | | 5 (7.4%) | | | | | 1 | | | | |  | | | | |
| Yes | | | | | 20 | | | | | 8 (40.0%) | | | | | 8.4 (2.3, 30.1) | | | | | 0.001 | | | | |
| Hemorrhage number | | | | |  | | | | |  | | | | |  | | | | |  | | | | |
| 0 | | | | | 63 | | | | | 4 (6.3%) | | | | | 1 | | | | |  | | | | |
| 1 | | | | | 18 | | | | | 5 (27.8%) | | | | | 5.7 (1.3, 24.1) | | | | | 0.019 | | | | |
| ≥2 | | | | | 7 | | | | | 4 (57.1%) | | | | | 19.7 (3.2, 119.9) | | | | | 0.001 | | | | |
|  | | | |  | | | | | Respiratory support | | | | | | | | | | | | | | |
|  | | | | TOTAL number | | | | | Event number (%) | | | | | OR (95%CI) | | | | | *P* | | | | |
| Cerebral hemorrhage | | | |  | | | | |  | | | | |  | | | | |  | | | | |
| No | | | | 63 | | | | | 12 (19.0%) | | | | | 1 | | | | |  | | | | |
| Yes | | | | 25 | | | | | 12 (48.0%) | | | | | 3.9 (1.4, 10.7) | | | | | 0.008 | | | | |
| Subdural hemorrhage | | | |  | | | | |  | | | | |  | | | | |  | | | | |
| No | | | | 78 | | | | | 16 (20.5%) | | | | | 1 | | | | |  | | | | |
| Yes | | | | 10 | | | | | 8 (80.0%) | | | | | 15.5 (3.0, 80.2) | | | | | 0.001 | | | | |
| Subarachnoid hemorrhage | | | |  | | | | |  | | | | |  | | | | |  | | | | |
| No | | | | 85 | | | | | 22 (25.9%) | | | | | 1 | | | | |  | | | | |
| Yes | | | | 3 | | | | | 2 (66.7%) | | | | | 5.7 (0.5, 66.3) | | | | | 0.162 | | | | |
| Intraventricular hemorrhage | | | |  | | | | |  | | | | |  | | | | |  | | | | |
| No | | | | 68 | | | | | 15 (22.1%) | | | | | 1 | | | | |  | | | | |
| Yes | | | | 20 | | | | | 9 (45.0%) | | | | | 2.9 (1.0, 8.3) | | | | | 0.048 | | | | |
| Hemorrhage number | | | |  | | | | |  | | | | |  | | | | |  | | | | |
| 0 | | | | 63 | | | | | 12 (19.0%) | | | | | 1 | | | | |  | | | | |
| 1 | | | | 18 | | | | | 6 (33.3%) | | | | | 2.1 (0.7, 6.8) | | | | | 0.205 | | | | |
| ≥2 | | | | 7 | | | | | 6 (85.7%) | | | | | 25.5 (2.8, 232.1) | | | | | 0.004 | | | | |
|  | | |  | | | | | Death | | | | | | | | | | | | | | |
|  | | | TOTAL number | | | | | Event number (%) | | | | | OR (95%CI) | | | | | *P* | | | | |
| Cerebral hemorrhage | | |  | | | | |  | | | | |  | | | | |  | | | | |
| No | | | 63 | | | | | 7 (11.1%) | | | | | 1 | | | | |  | | | | |
| Yes | | | 25 | | | | | 10 (40.0%) | | | | | 5.3 (1.7, 16.4) | | | | | 0.003 | | | | |
| Subdural hemorrhage | | |  | | | | |  | | | | |  | | | | |  | | | | |
| No | | | 78 | | | | | 12 (15.4%) | | | | | 1 | | | | |  | | | | |
| Yes | | | 10 | | | | | 5 (50.0%) | | | | | 5.5 (1.4, 21.9) | | | | | 0.016 | | | | |
| Subarachnoid hemorrhage | | |  | | | | |  | | | | |  | | | | |  | | | | |
| No | | | 85 | | | | | 15 (17.6%) | | | | | 1 | | | | |  | | | | |
| Yes | | | 3 | | | | | 2 (66.7%) | | | | | 9.3 (0.8, 109.7) | | | | | 0.076 | | | | |
| Intraventricular hemorrhage | | |  | | | | |  | | | | |  | | | | |  | | | | |
| No | | | 68 | | | | | 8 (11.8%) | | | | | 1 | | | | |  | | | | |
| Yes | | | 20 | | | | | 9 (45.0%) | | | | | 6.1 (1.9, 19.4) | | | | | 0.002 | | | | |
| Hemorrhage number | | |  | | | | |  | | | | |  | | | | |  | | | | |
| 0 | | | 63 | | | | | 7 (11.1%) | | | | | 1 | | | | |  | | | | |
| 1 | | | 18 | | | | | 5 (27.8%) | | | | | 3.1 (0.8, 11.3) | | | | | 0.089 | | | | |
| ≥2 | | | 7 | | | | | 5 (71.4%) | | | | | 20.0 (3.2, 123.2) | | | | | 0.001 | | | | |
|  | |  | | | | | PSOFA>1 | | | | | | | | | | | | | | |
|  | | TOTAL number | | | | | Event number (%) | | | | | OR (95%CI) | | | | | *P* | | | | |
| Cerebral hemorrhage | |  | | | | |  | | | | |  | | | | |  | | | | |
| No | | 63 | | | | | 18 (28.6%) | | | | | 1 | | | | |  | | | | |
| Yes | | 25 | | | | | 13 (54.2%) | | | | | 5.3 (1.7, 16.4) | | | | | 0.003 | | | | |
| Subdural hemorrhage | |  | | | | |  | | | | |  | | | | |  | | | | |
| No | | 78 | | | | | 24 (30.8%) | | | | | 1 | | | | |  | | | | |
| Yes | | 10 | | | | | 7 (77.8%) | | | | | 5.5 (1.4, 21.9) | | | | | 0.016 | | | | |
| Subarachnoid hemorrhage | |  | | | | |  | | | | |  | | | | |  | | | | |
| No | | 85 | | | | | 30 (35.3%) | | | | | 1 | | | | |  | | | | |
| Yes | | 3 | | | | | 1 (50.0%) | | | | | 9.3 (0.8, 109.7) | | | | | 0.076 | | | | |
| Intraventricular hemorrhage | |  | | | | |  | | | | |  | | | | |  | | | | |
| No | | 68 | | | | | 20 (29.9%) | | | | | 1 | | | | |  | | | | |
| Yes | | 20 | | | | | 11 (55.0%) | | | | | 6.1 (1.9, 19.4) | | | | | 0.002 | | | | |
| Hemorrhage number | |  | | | | |  | | | | |  | | | | |  | | | | |
| 0 | | 63 | | | | | 18 (28.6%) | | | | | 1 | | | | |  | | | | |
| 1 | | 18 | | | | | 8 (44.4%) | | | | | 3.1 (0.8, 11.3) | | | | | 0.089 | | | | |
| ≥2 | | 7 | | | | | 5 (83.3%) | | | | | 20.0 (3.2, 123.2) | | | | | 0.001 | | | | |
|  |  | | | | | Shock | | | | | | | | | | | | | | |
|  | TOTAL number | | | | | Event number (%) | | | | | OR (95%CI) | | | | | *P* | | | | |
| Cerebral hemorrhage |  | | | | |  | | | | |  | | | | |  | | | | |
| No | 63 | | | | | 4 (6.3%) | | | | | 1 | | | | |  | | | | |
| Yes | 25 | | | | | 5 (20.0%) | | | | | 3.7 (0.9, 15.1) | | | | | 0.07 | | | | |
| Subdural hemorrhage |  | | | | |  | | | | |  | | | | |  | | | | |
| No | 78 | | | | | 7 (9.0%) | | | | | 1 | | | | |  | | | | |
| Yes | 10 | | | | | 2 (20.0%) | | | | | 2.5 (0.4, 14.3) | | | | | 0.293 | | | | |
| Subarachnoid hemorrhage |  | | | | |  | | | | |  | | | | |  | | | | |
| No | 85 | | | | | 8 (9.4%) | | | | | 1 | | | | |  | | | | |
| Yes | 3 | | | | | 1 (33.3%) | | | | | 4.8 (0.4, 59.1) | | | | | 0.22 | | | | |
| Intraventricular hemorrhage |  | | | | |  | | | | |  | | | | |  | | | | |
| No | 68 | | | | | 5 (7.4%) | | | | | 1 | | | | |  | | | | |
| Yes | 20 | | | | | 4 (20.0%) | | | | | 3.1 (0.8, 13.1) | | | | | 0.114 | | | | |
| Hemorrhage number |  | | | | |  | | | | |  | | | | |  | | | | |
| 0 | 63 | | | | | 4 (6.3%) | | | | | 1 | | | | |  | | | | |
| 1 | 18 | | | | | 3 (16.7%) | | | | | 2.9 (0.6, 14.6) | | | | | 0.185 | | | | |
| ≥2 | 7 | | | | | 2 (28.6% | | | | | 5.9 (0.9, 40.5) | | | | | 0.071 | | | | |

Abbreviation: pSOFA, pediatric sequential organ failure assessment; ICU, intensive care unit; OR, odd ratios.

Supplementary Fig. 1 Data source

|  |  | Mature | | |
| --- | --- | --- | --- | --- |
| Cerebral hemorrage number | Event number (%) | OR (95%CI) | *P* |
| ICU admission | 17 | 3 (17.6%) | 10.1 (1.0, 104.6) | 0.053 |
| Respiratory support | 17 | 6 (35.3%) | 2.1 (0.6, 7.0) | 0.239 |
| PSOFA>1 | 17 | 7 (41.2%) | 1.9 (0.6, 6.0) | 0.283 |
| Shock | 17 | 1 (5.9%) | 0.9 (0.1, 9.7) | 0.957 |
| Death | 17 | 4 (23.5%) | 3.4 (0.7, 15.4) | 0.115 |
|  |  | Premature | | |
| Cerebral hemorrage number | Event number (%) | OR (95%CI) | *P* |
| ICU admission | 8 | 6 (75.0%) | 12.0 (1.6, 92.3) | 0.017 |
| Respiratory support | 8 | 6 (75.0%) | 19.5 (2.2, 173.5) | 0.008 |
| PSOFA>1 | 8 | 6 (85.7%) | 12.0 (1.1, 128.8) | 0.040 |
| Shock | 8 | 4 (50.0%) | 14.0 (1.2, 163.4) | 0.035 |
| Death | 8 | 6 (75.0%) | 12.0 (1.6, 92.3) | 0.017 |

Abbreviation: pSOFA, pediatric sequential organ failure assessment; ICU, intensive care unit; OR, odd ratios.

|  |  | Normal labor | | |
| --- | --- | --- | --- | --- |
| Cerebral hemorrage number | Event number (%) | OR (95%CI) | *P* |
| ICU admission | 21 | 6 (28.6%) | 5.7 (1.3, 25.8) | 0.023 |
| Respiratory support | 21 | 8 (38.1%) | 2.5 (0.8, 7.9) | 0.111 |
| PSOFA>1 | 21 | 7 (33.3%) | 4.1 (1.1, 15.0) | 0.033 |
| Shock | 21 | 9 (45.0%) | 2.3 (0.8, 7.0) | 0.134 |
| Death | 21 | 4 (23.5%) | 3.4 (0.7, 15.4) | 0.115 |
|  |  | Abnormal labor | | |
| Cerebral hemorrage number | Event number (%) | OR (95%CI) | *P* |
| ICU admission | 4 | 3 (75.0%) | 48.0 (2.3, 997.2) | 0.012 |
| Respiratory support | 4 | 4 (100.0%) | - | - |
| PSOFA>1 | 4 | 3 (75.0%) | 22.5 (1.5, 335.4) | 0.024 |
| Shock | 4 | 4 (100.0%) | - | - |
| Death | 4 | 2 (50.0%) | 7.5 (0.6, 87.2) | 0.107 |

Abbreviation: pSOFA, pediatric sequential organ failure assessment; ICU, intensive care unit; OR, odd ratios.
